# Supplementary material for: ¿Por qué trabajar? Las 4 p's
Source: MDPI journal article supplement (doi:10.3390/nu15040984), 2006-01-01
Supplement: s1 [file s1]

**Table S1** Participant flow of enrolled infants with dietary data at baseline and follow-ups.

| Number of subjects with dietary data at baseline and follow-ups |       |       |       |       |       |       |       |     |     |     |     |     |     |     |     |     |     |
|-----------------------------------------------------------------|-------|-------|-------|-------|-------|-------|-------|-----|-----|-----|-----|-----|-----|-----|-----|-----|-----|
| Age (months)                                                    | 1*    | 2*    | 3     | 4     | 5     | 6     | 7     | 8   | 9   | 12  | 18  | 24  | 36  | 48  | 60  | 72  | 96  |
|                                                                 | 1,049 | 1,213 | 1,188 | 1,144 | 1,131 | 1,098 | 1,018 | 990 | 971 | 946 | 797 | 820 | 576 | 535 | 492 | 527 | 447 |
| Number of subjects excluded due to...                           |       |       |       |       |       |       |       |     |     |     |     |     |     |     |     |     |     |
| Inaccurate eating frequency** or illness                        | 6     | 1     | 9     | 12    | 18    | 18    | 20    | 25  | 36  | 30  | 28  | 29  | 19  | 7   | 9   | 7   | 3   |
| Breastfeeding***                                                | 427   | 379   | 340   | 324   | 297   | 269   | 215   | 188 | 152 | 87  | 27  | 13  | 1   | --  | --  | --  | --  |
| Study population N = 1,244                                      |       |       |       |       |       |       |       |     |     |     |     |     |     |     |     |     |     |
| Subjects                                                        | 616   | 833   | 839   | 808   | 815   | 812   | 784   | 778 | 783 | 829 | 742 | 778 | 556 | 528 | 483 | 520 | 444 |

\*Infants were enrolled during the first 2 months of life. \*\*Inaccurate eating frequency defined as missing time information or as food records, in which EF was not assigned to one particular point in time, e.g. "during day". \*\*\* Number of breastfed infants were included in the sub analysis resulting in a total of 1,370 infants and a total of 536 breastfed infants at a given time point.
