# Supplementary material for: ¿Por qué trabajar? Las 4 p's
Source: MDPI journal article supplement (doi:10.3390/nu15040984), 2006-01-01
Supplement: s1 [file s1]

**Table S2** Characteristics of participating children and their parents

| <b>Characteristics</b>                                         | <b>Main study<br/>population<br/>(N = 1,244)</b> | <b>Sub study<br/>population*<br/>(N = 1,370)</b> |
|----------------------------------------------------------------|--------------------------------------------------|--------------------------------------------------|
| Girls, n (%)                                                   | 624 (50)                                         | 689 (50)                                         |
| Country, n (%)                                                 |                                                  |                                                  |
| Belgium                                                        | 163 (13)                                         | 182 (13)                                         |
| Germany                                                        | 214 (17)                                         | 235 (17)                                         |
| Italy                                                          | 314 (25)                                         | 370 (27)                                         |
| Poland                                                         | 214 (17)                                         | 222 (16)                                         |
| Spain                                                          | 339 (27)                                         | 361 (26)                                         |
| Intervention group, n (%)                                      |                                                  |                                                  |
| Experimental group (formula with low protein)                  | 458 (37)                                         | 469 (34)                                         |
| Control group (formula with high protein)                      | 461 (37)                                         | 463 (34)                                         |
| Observational group (Breastfed Infants)                        | 325 (26)                                         | 438 (32)                                         |
| Highest education level reached by one of the parents**, n (%) |                                                  |                                                  |
| High                                                           | 382 (31)                                         | 438 (32)                                         |
| Middle                                                         | 646 (52)                                         | 705 (51)                                         |
| Low                                                            | 214 (17)                                         | 225 (16)                                         |
| Birthweight of the child, m $\pm$ SD                           | 3,290 $\pm$ 350                                  | 3,296 $\pm$ 345                                  |
| Week child was born, m $\pm$ SD                                | 40 $\pm$ 1                                       | 40 $\pm$ 1                                       |
| Mother's age at child's birth in years, m $\pm$ SD             | 30 $\pm$ 5                                       | 30 $\pm$ 5                                       |
| Smoking in pregnancy, n (%)                                    | 431 (35)                                         | 462 (34)                                         |
| Week child was introduced to complementary foods, m $\pm$ SD   | 18.9 $\pm$ 5.1                                   | 19.2 $\pm$ 5.0                                   |

Missing information: Smoking in pregnancy, n = 3; Education parents, n = 2; Age mother, n = 1; Week child born, n = 2; Introduction complementary feeding, n = 32. \* Sub study population include breastfed infants. \*\* Education level classified according to International Standard Classification of Education [26].
